# Supplementary material
Source: Springer Nature journal article supplement (https://www.springermedizin.de/resource/supplementary/12877_2007_95_MOESM3_ESM.pdf/9441176)
Supplement: MOESM3 [file 9441176]

### Additional file 3: Excluded studies

| Reference                                                      | Reason for Exclusion                                                            |
|----------------------------------------------------------------|---------------------------------------------------------------------------------|
| Muzzarelli and Pfisterer. Am Heart J Cardiol 2006 152:991-996  | Specific disease group                                                          |
| Penninx et al. J Gerontology 2006 61A:474-479                  | EPESE - use Salive 1992                                                         |
| Semba et al. Biological Trace Element Research 2006 112:97-108 | Women's Health and Aging Studies I and II - use Semba 2004                      |
| Beutler and West. Blood 2005 106:740-745                       | Data for elderly not given separately                                           |
| Cesari et al. Osteoporosis Int 2005 16:691-699                 | in Chianti - use Penninx 2004                                                   |
| Chaves et al J Gerontol A Biol Sci Med Sci 2005 60A:729-735    | Women's Health and Aging Studies I and II - use Semba 2004                      |
| Choi et al. Arch Gerontol Geriatr 2005 41:303-309              | Incidence study, and is part of Choi 2004                                       |
| Ershler et al. JAGS 2005 53:1360-1365                          | Not prevalence study, not limited to elderly                                    |
| Hollowell et al. Vital Health Stat 2005 11:1-156               | NHANESIII No data on anaemia - use Guralnik 2004                                |
| Ischine et al. JAGS 2005 53:733-734                            | No age limits given                                                             |
| van Dijk PT et al. JAGS 2005 53:660-665                        | No definition of anaemia given                                                  |
| Wieczorowska-Tobis K et al. Wiadomosci Lekarskie 2005 58:56-61 | <100 subjects                                                                   |
| Cesari et al. J Gerontol A Biol Med Sci 2004 59:249-254        | In Chianti - use Penninx 2004                                                   |
| Chaves et al. JAGS 2004 52:1811-1816                           | Women's Health and Aging study I - use Semba 2004                               |
| Cheng et al. Lab Hematol 2004 10:42-53                         | NHANES III. No useable data - use Semba 2004                                    |
| Herzog et al. J Cardiac Fail 2004;10:467-472                   | No definition of anaemia - uses ICD code                                        |
| Penninx et al. Am J Med 2003 115:104-110                       | EPESE (Iowa and Washington state) - use Salive 1992                             |
| Yamada et al. Eur J Haematol 2003 70:129-135                   | No prevalence data                                                              |
| Chaves et al. JAGS 2002 50:1257-1264                           | Women's Health and Aging studies I and II - no prevalence data - use Semba 2004 |
| Cherentsky et al. Harefuah 2002 141:591-594                    | In Hebrew, translation not available                                            |
| Argyriadou et al. BMC Family Practice 2001 2:5                 | Two subgroups <100 subjects                                                     |
| Fischbacher et al. BMJ 2001 322:958-959                        | No separate data for elderly                                                    |

|                                                           |                                                                                       |
|-----------------------------------------------------------|---------------------------------------------------------------------------------------|
| Kikuchi et al. JAGS 2001 49:1226-1228                     | No prevalence data                                                                    |
| Wu et al. N Engl J Med 2001 345:1230-1236                 | Complete cohort not adequately described. Single threshold for men and women          |
| Nilsson-Ehle et al. Eur J Haematol 2000 65:297-305        | 70 y-old people in Gothenburg study - use Nilsson-Ehle 1988                           |
| Ania et al. Am J Geriatr Soc 1997 45:825-831              | Olmsted county - use Ania 1994                                                        |
| Lombardi et al. JAGS 1996 44:740-741                      | Not prevalence study                                                                  |
| Liu et al. Gaoxiong Yi Xue Ke Xue Za Zhi 1994 10:683-688  | In Chinese, translation not available                                                 |
| Ohhara et al. Nippon Ronen Igakkai Zasshi 1994 31:548-553 | In Japanese, translation not available                                                |
| Kafatos et al. J Am Coll Nutr 1993 12:685-692             | Abstract only available - insufficient information                                    |
| Dirren et al. Eur J Clin Nutr 1991 45(Suppl3):43-52       | SENECA - use Lesourd 1996                                                             |
| Chen et al. Int J Vitam Nutr Res 1989 59:207-213          | Two subgroups <100 subjects                                                           |
| Zauber and Zauber. JAMA 1987 257:2181-2184                | <100 subjects                                                                         |
| Dallman et al. Am J Clin Nutr 1984 39:437-445             | NHANES II, use Guralnik 2004 (NHANES III) - may be overall, study similar populations |
| Yip et al. Am J Clin Nutr 1984 39:427-436                 | NHANES II. No prevalence data                                                         |
| Hale et al. Age Ageing 1983 12:275-284                    | Dunedin Program - use Celestin-Roux 1987                                              |
| Landahl et al. Clin Chim Acta 1981 112:301-314            | 70 y-old people in Gothenburg study - use Nilsson-Ehle 1988                           |
| Jernigan et al. J Am Geriatr Soc 1980 28:308-314          | <100 subjects                                                                         |
